# Supplementary material for: Improvement of near-surface wind speed modeling through refined aerodynamic roughness length in high-roughness surface regions: implementation and validation in the Weather Research and Forecasting (WRF) model version 4.0
Source: Copernicus journal article supplement (doi:10.5194/gmd-18-10077-2025), 2025-12-16
Supplement: Supplementary file 1 [file gmd-18-10077-2025-supplement.pdf]

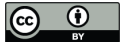

*Supplement of*

**Improvement of near-surface wind speed modeling through refined aerodynamic roughness length in high-roughness surface regions: implementation and validation in the Weather Research and Forecasting (WRF) model version 4.0**

**Jiamin Wang et al.**

*Correspondence to:* Kun Yang (yangk@tsinghua.edu.cn)

The copyright of individual parts of the supplement might differ from the article licence.

10 **S1. The settings of  $z_{0\_Peng}$  in the WRF model**

Before conducting the simulation of wind speed in the WRF model with the gridded  $z_{0\_Peng}$ , we had adjusted the roughness length over vegetated fraction ( $z_{0\_veg}$ ) in each grid from  $z_{0\_Peng}$ . Then, the default  $z_0$  values in WRF over vegetated fraction were replaced with  $z_{0\_veg}$ .

15 The mean shear stress ( $\tau = \rho u_*^2$ ) in a grid is the sum of the shear stress over the bare and the vegetated areas weighted by vegetation fraction ( $FVEG$ ):

$$u_{*mean}^2 = u_{*bare}^2 * (1 - FVEG) + u_{*veg}^2 * FVEG \quad (1)$$

where  $u_{*mean}$  is the mean friction velocity (m/s) derived with  $z_{0\_Peng}$ ;  $u_{*veg}$  and  $u_{*bare}$  are the friction velocity in the vegetated and the bare fraction, which are derived with  $z_{0\_veg}$  and the roughness length over the bare fraction ( $z_{0\_bare}$ ).

20 Under neutral conditions,  $z_{0\_veg}$  can be expressed as:

$$z_{0\_veg} = e^{\ln(z_{ref}) - \left\{ \left[ \left( \ln\left(\frac{z_{ref}}{z_{0\_Peng}}\right) \right)^{-2} - (1 - FVEG) * \left( \ln\left(\frac{z_{ref}}{z_{0\_bare}}\right) \right)^{-2} \right] * \frac{1}{FVEG} \right\}^{-\frac{1}{2}}} \quad (2)$$

where  $z_{ref}$  is the reference height (m), and  $z_{0\_bare}$  and  $FVEG$  can be obtained from WRF model.

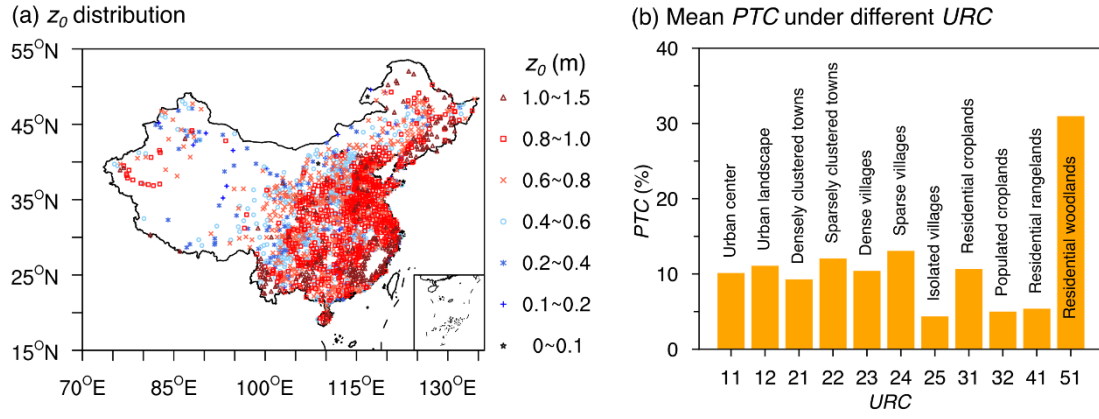

25 **Figure S1.** (a) Spatial distributions of annual mean  $z_{0\_optimal}$  across 2,161 CMA stations. (b) Mean percent tree cover ( $PTC$ ) for each  $URC$ . The numerical labels on the x-axis represent the  $URC$  codes, with the specific  $URC$  types annotated on the bars.

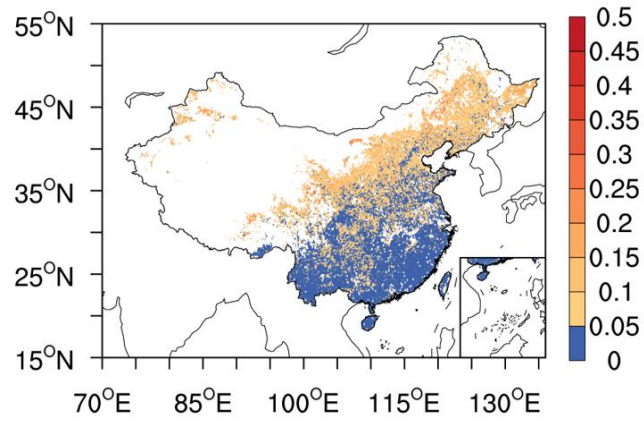

30 **Figure S2.** Spatial distributions of the standard deviation of monthly  $\ln(z_{0\_RFR})$ .

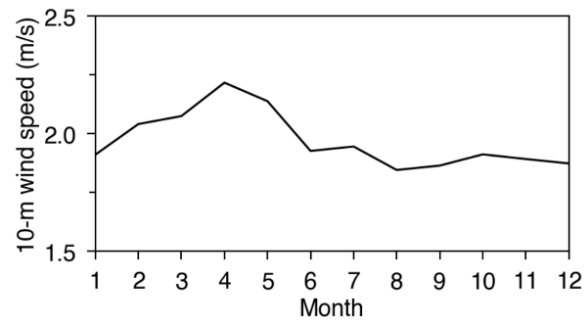

**Figure S3.** Monthly variations of the 10-m wind speed averaged over the d02 domain during 2015-2019 from ERA5.

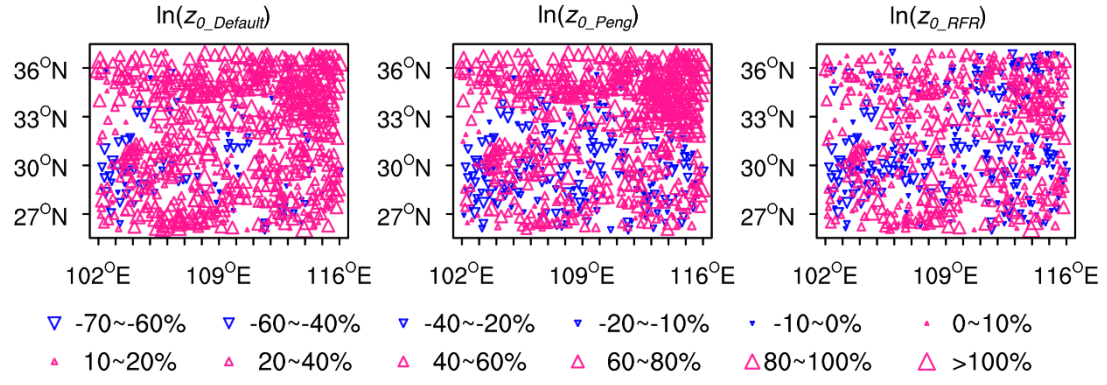

**Figure S4.** Distributions of mean bias percentage (*MBP*) in 10-m wind speed from simulations using  $z_{0\_Default}$ ,  $z_{0\_Peng}$  and  $z_{0\_RFR}$  against observations from CMA stations.

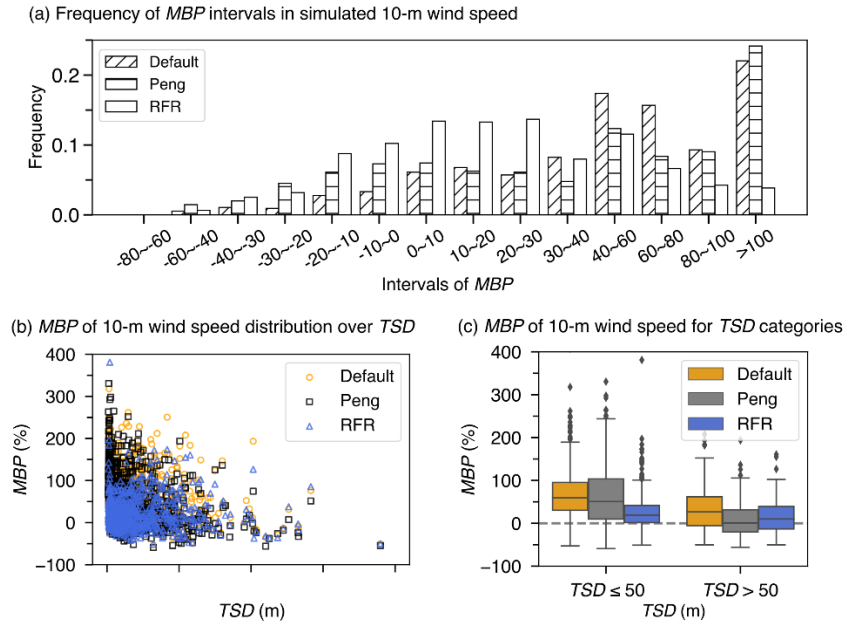

40 **Figure S5.** Same as Fig. 5 but for simulations in October 2019 instead of April.

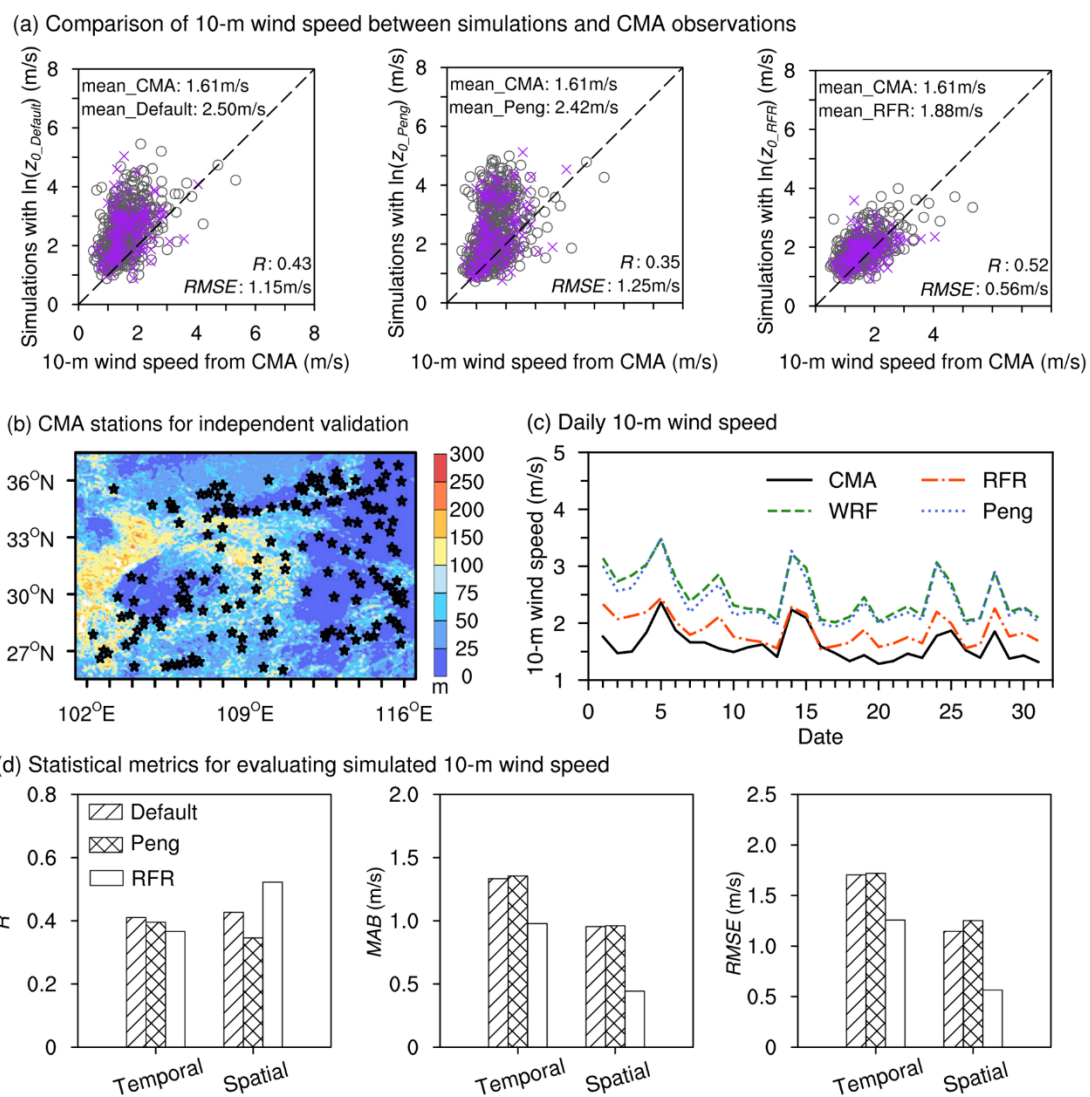

**Figure S6.** Same as Fig. 6 but for simulations in October 2019 instead of April.

(a) Comparison of 100-m wind speed between simulations and anemometer towers

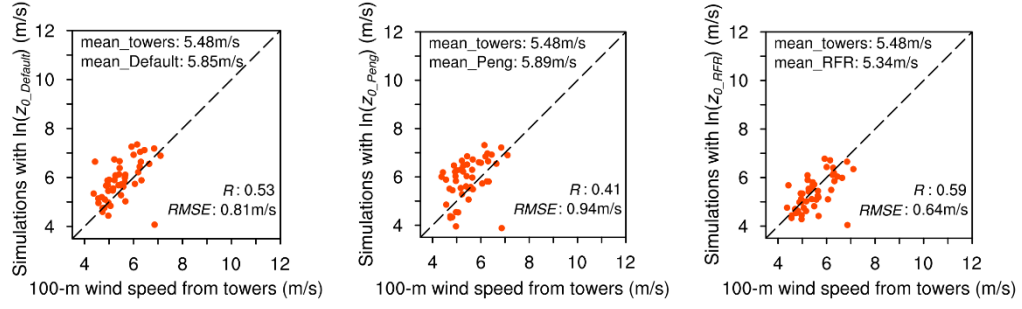

(b) Distribution of anemometer towers

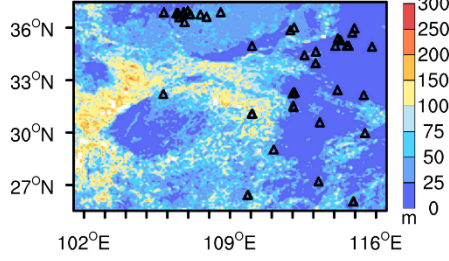

(c) MBP of 100-m wind speed distribution over TSD

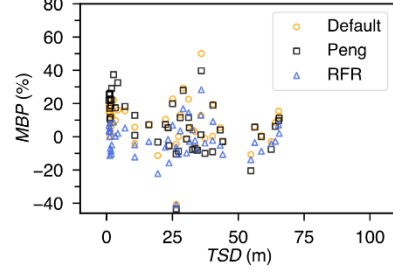

(d) Statistical metrics for evaluating simulated 100-m wind speed

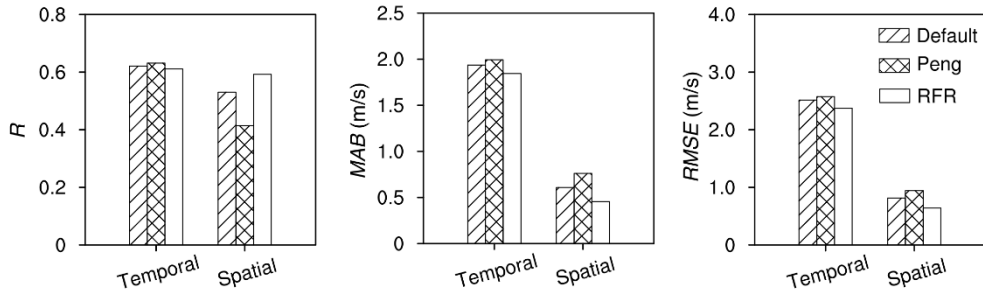

**Figure S7.** Same as Fig. 7 but for simulations in October 2019 instead of April. A total of 48 anemometer towers were used for 100-m wind speed evaluation.

(a) Comparison of 10-m wind speed between simulations and CMA observations

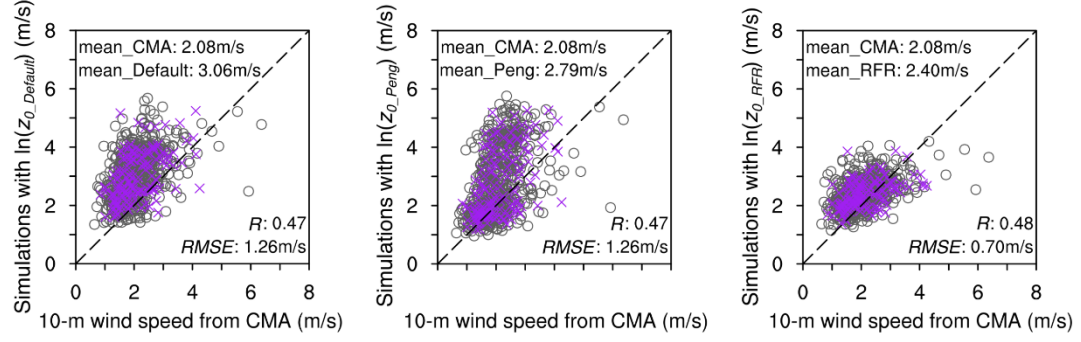

(b) Comparison of 100-m wind speed between simulations and anemometer towers

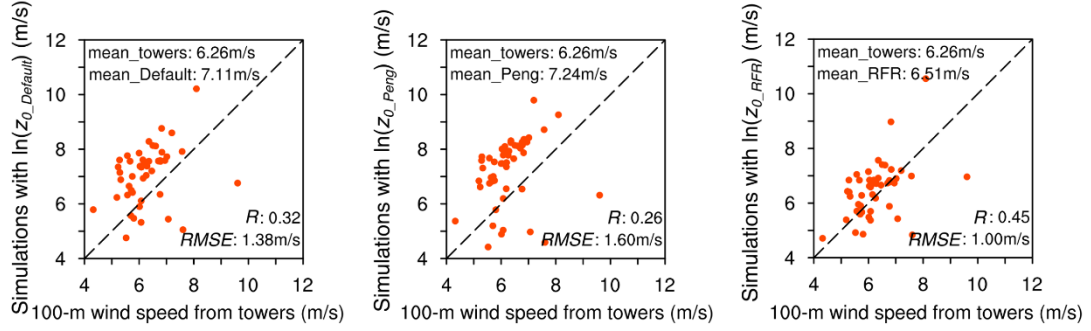

50 **Figure S8.** (a) Comparison of mean 10-m wind speeds in April between the coarse-resolution ( $0.09^\circ$ ; d01) simulations using  $z_{0\_Default}$ ,  $z_{0\_Peng}$ , and  $z_{0\_RFR}$  and observations from CMA stations. All points (grey circles and purple crosses) represent the 753 CMA stations within the d02 domain available for comparison, while the purple crosses represent the 148 stations utilized for independent validation, which were not used in training the  $z_{0\_RFR}$  model. (b) Comparison of mean 100-m wind speeds in April between the coarse-resolution ( $0.09^\circ$ ; d01) simulations using  $z_{0\_Default}$ ,  $z_{0\_Peng}$ , and  $z_{0\_RFR}$  and observations from anemometer towers. The corresponding wind speed means,  $R$ , and  $RMSE$  of all stations are also indicated.

55

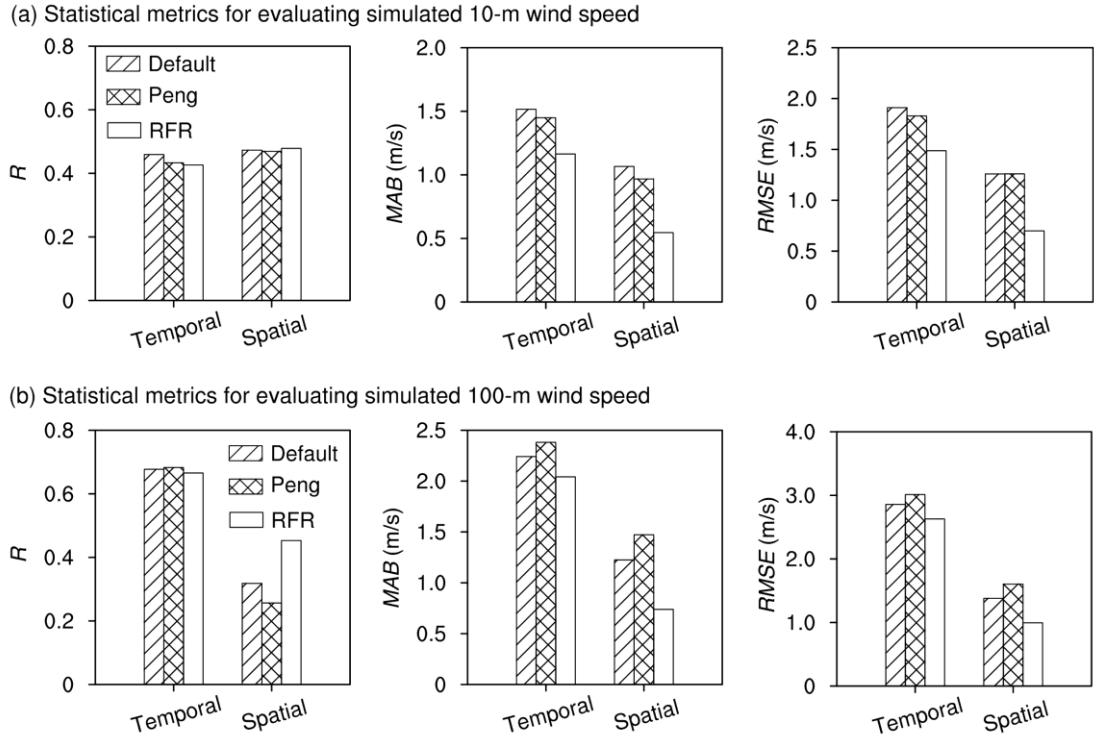

**Figure S9.** Statistical comparison of the coarse-resolution ( $0.09^\circ$ ; d01) simulations and observations within the d02

60 domain. (a) 10-m wind speeds from 753 CMA stations, and (b) 100-m wind speeds from 50 anemometer towers.

Temporal and spatial  $R$ ,  $MAB$ , and  $RMSE$  are included.

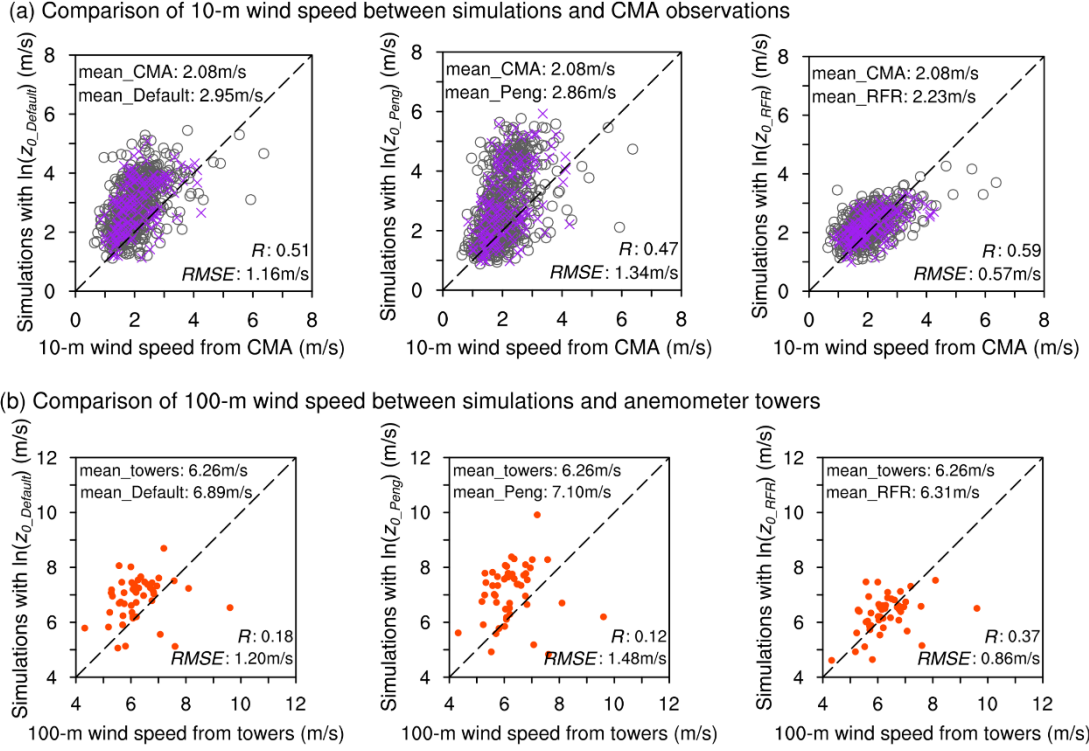

**Figure S10.** Comparison between simulated wind speeds and observations, with WRF driven by NCEP reanalysis

65 data. (a) Comparisons of mean 10-m wind speed in April between the simulations using  $z_{0\_Default}$ ,  $z_{0\_Peng}$ , and  $z_{0\_RFR}$  versus observations from CMA stations. All points (grey circles and purple crosses) represent the 753 CMA stations within the d02 domain available for comparison, while the purple crosses represent the 148 stations utilized for independent validation, which were from the test subset employed in  $z_{0\_RFR}$  development. The corresponding wind speed means,  $R$ , and  $RMSE$  of all stations are indicated. (b) Comparisons of mean 100-m wind speed in April

70 between the simulations using  $z_{0\_Default}$ ,  $z_{0\_Peng}$ , and  $z_{0\_RFR}$  versus observations from anemometer towers. The corresponding wind speed means,  $R$ , and  $RMSE$  of all towers are also indicated.

**Table S1.** Mean 10-m wind speed at 753 CMA stations and mean 100-m wind speed at 50 anemometer towers from simulations and observations. Simulations were performed using  $z_{0\_Default}$ ,  $z_{0\_Peng}$ , and  $z_{0\_RFR}$ , respectively, with NCEP reanalysis data used as the driving input for the WRF model. Also shown is the percentage reduction in wind speed error ( $PRE$ ) achieved by  $z_{0\_RFR}$  relative to  $z_{0\_Default}$  and  $z_{0\_Peng}$ .

|                               | $z_{0\_Default}$ | $z_{0\_Peng}$ | $z_{0\_RFR}$ | Observations |
|-------------------------------|------------------|---------------|--------------|--------------|
| Mean 10-m wind speed (m/s)    | 2.95             | 2.86          | 2.23         | 2.08         |
| $PRE$ in 10-m wind speed (%)  | 82.8%            | 80.8%         | -            | -            |
| Mean 100-m wind speed (m/s)   | 6.89             | 7.10          | 6.31         | 6.26         |
| $PRE$ in 100-m wind speed (%) | 92.1%            | 94.0%         | -            | -            |

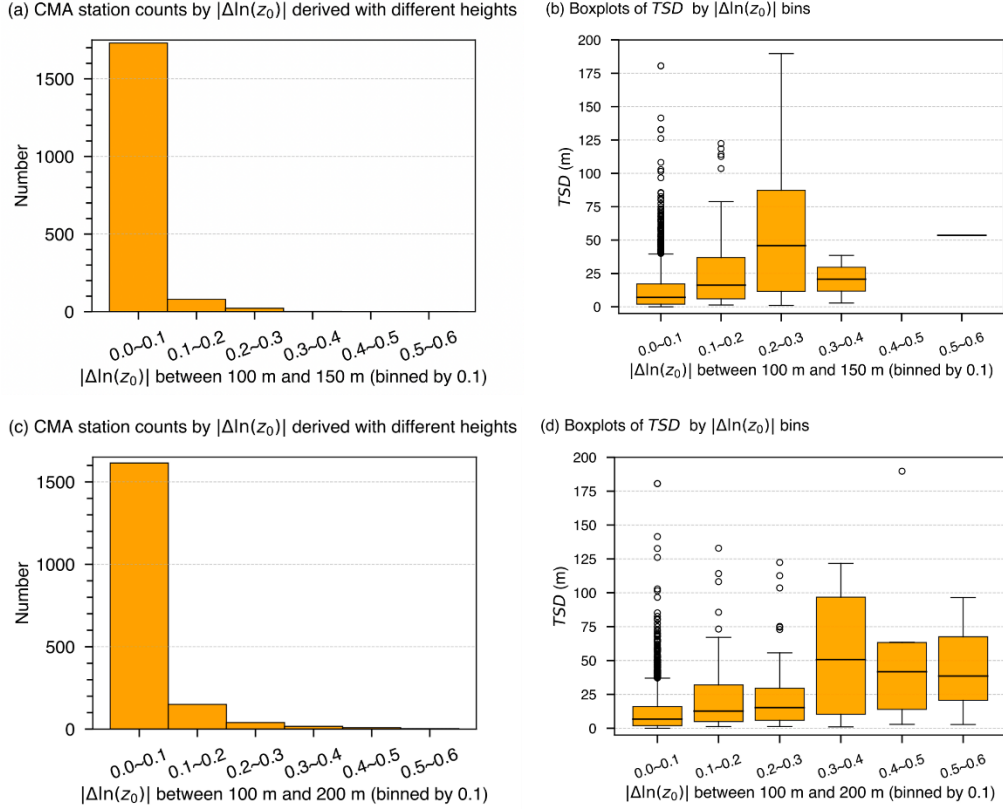

80 **Figure S11.** Sensitivity of the reference-height choice in Assumption 1 for  $z_{0\_CMA}$  estimation. (a, c) Distributions of station counts by the absolute difference in annual-mean  $z_{0\_CMA}$  values between estimates using 150 m (a) or 200 m (c) and those using 100 m. (b, d) Boxplots of  $TSD$  across bins of the absolute difference in annual-mean derived  $\ln(z_0)$ . (b, d) Boxplots of  $TSD$  versus binned absolute differences in annual-mean  $z_{0\_CMA}$ , computed relative to the 100-m-based estimate for 150 m (b) and 200 m (d).
